# **Intrinsic bursts facilitate learning of Lévy flight movements in recurrent neural network models**

Morihiro Ohta\*, Toshitake Asabuki\* and Tomoki Fukai

*Okinawa Institute of Science and Technology,*

*Tancha 1919-1, Onna-son,*

*Okinawa 904-0495, JAPAN*

## **Abstract**

**Isolated spikes and bursts of spikes are thought to provide the two major modes of information coding by neurons. Bursts are known to be crucial for fundamental processes between neuron pairs, such as neuronal communications and synaptic plasticity. Deficits in neuronal bursting can also impair higher cognitive functions and cause mental disorders. Despite these findings on the roles of bursts, whether and how bursts have an advantage over isolated spikes in the network-level computation remains elusive. Here, we demonstrate in a computational model that not isolated spikes but intrinsic bursts can greatly facilitate learning of Lévy flight random walk trajectories by synchronizing burst onsets across neural population. Lévy flight is a hallmark of optimal search strategies and appears in cognitive behaviors such as saccadic eye movements and memory retrieval. Our results suggest that bursting is a crucial component of sequence learning by recurrent neural networks in the brain.**

\*These authors contributed equally to this work.

## 24 INTRODUCTION

25 Neurons in the brain display variety of temporal discharging patterns, among which bursting rep-  
26 resents the generation of multiple spikes with brief inter-spike intervals (typically, several mil-  
27 liseconds) in a short period of time (typically, several tens to hundreds of milliseconds). Bursting  
28 neurons are found ubiquitously in the brain and are thought to play active roles in transferring  
29 and routing information [1–5], inducing synaptic plasticity [6, 7], and supporting and/or altering  
30 cognitive functions [2, 7–14]. Deficits in burst generation can cause mental disorders [15, 16].  
31 While our understanding of the roles of bursting has been advanced, the computational advantages  
32 of spike bursts over isolated spikes remain elusive.

33 Here, we show the benefits of bursting activity in learning sequences generated by a special  
34 class of random walks observed in various animal behaviors. We investigate whether and how  
35 bursting neurons improve the ability of neural network models to learn the dynamical trajectories  
36 of Lévy flight, which is a random walk with step sizes obeying a heavy-tailed distribution [17–  
37 19]. As a consequence, Lévy flight consists of many short steps and rare long-distance jumps.  
38 A well-known characteristic of Lévy flight is that it makes search more efficient than Brownian  
39 walks which only consist of relatively short steps [20, 21]. Many processes observed in biology  
40 [22–24] and physics [25, 26] can be described as Lévy flight. In neuroscience, an interesting  
41 example of Lévy flight is the stochastic trajectories of saccadic eye movement [27] on which the  
42 visual exploration of the objects of interest significantly relies. Several cortical and subcortical  
43 regions including the frontal eye field, superior colliculus, and cerebellar cortex participate in  
44 controlling and executing saccades [28] and various neurons show spike bursts in these regions  
45 [8, 9, 29, 30]. Other examples of Lévy flight are found in memory processing of animals. In  
46 the spatial exploration of rodents, the animal spends the majority of time for exploring small  
47 local areas but occasionally travels to distant places at greater speeds [31]. Hippocampal [10]  
48 and subicular [32] neurons can learn spatial receptive fields and are known to exhibit burst firing.  
49 In human subjects, memory recall can be viewed as foraging behavior obeying Lévy flight [33–  
50 35]. The appearance of Lévy flight in various types of foraging behavior and the participation  
51 of bursting neurons in the relevant brain regions motivate us to explore what benefits neuronal  
52 bursting brings to the learning and execution of such behavior.

53 For this purpose, we employ reservoir computing (RC) that uses a recurrent network model and  
54 FORCE learning of information-readout neurons for efficient learning of time-varying external

55 signals (i.e., teaching signals) [36]. Originally, RC and FORCE learning were formulated for  
56 rate-coding neurons, and FORCE learning of continuous dynamical trajectories is generally fast.  
57 The RC system was also quite successful in modeling neural activities recorded from various  
58 cortical areas [37–40]. Later, RC was extended to networks of spiking neurons [41, 42], and  
59 variants of FORCE learning or some other learning method [43] for spiking neurons have also  
60 been proposed [44–46]. Results of the previous studies have indicated that isolated spikes are  
61 sufficient for learning smooth trajectories. However, whether and how isolated spikes and bursts  
62 contribute differently to learning a more general class of sequences has not been explored. In this  
63 study, we clarify this by using a spiking-neuron version of FORCE learning for training an RC  
64 system of bursting neurons.

## 65 RESULTS

### 66 Network model

67 Our model follows the conventional framework of reservoir computing except that neurons con-  
68 stituting a recurrent network called reservoir have regular-spiking (RS) and bursting modes (Fig.  
69 1a). In the RS mode, the neurons tend to generate isolated spikes (Fig. 1b) whereas they are  
70 strongly bursty in the bursting mode (Fig. 1c). Neurons in the reservoir project to two readout  
71 neurons to describe the two-dimensional coordinates  $(x_1, x_2)$  of Lévy flight, and the outputs of  
72 these neurons are fed back to all neurons in the reservoir. We describe neurons in the reservoir  
73 with the Izhikevich model, which is able to mimic the temporal discharging patterns of various  
74 neurons [47]:

$$\begin{aligned}\frac{dv_i}{dt} &= 0.04v_i^2 + 5u_i + 140 - u_i + I_i, \\ \frac{du_i}{dt} &= a(bv_i - u_i),\end{aligned}\tag{1}$$

75 where  $a = 0.02$  and  $b = 0.2$ , and  $i$  is a neuron index. We set as  $c = -65$  mV and  $d = 8$  in the  
76 RS mode and  $c = -50$  mV and  $d = 2$  in the bursting mode. The values of  $v_i$  and  $u_i$  are reset to  $c$   
77 and  $u_i + d$  when  $v_i$  reaches the threshold of 30 mV. We use this model for simplicity of numerical  
78 simulations although the Izhikevich model does not take refractory periods into account and may  
79 exhibit unrealistically high frequency bursting.

80 Synaptic current is given as  $I_i = s_i(t) + I_b$ , where  $I_b$  is a constant bias and recurrent synaptic

81 inputs are

$$s_i(t) = \sum_{j=1}^N w_{ij} r_j(t), \quad (2)$$

$$w_{ij} = G w_{ij}^0 + Q \sum_{k=1,2} \eta_i^{(k)} \phi_j^{(k)}, \quad (3)$$

82 in terms of the instantaneous firing rate  $r_i(t)$  of neuron  $i$  at time  $t$ . The synaptic weight matrix  $w_{ij}$   
83 has non-modifiable components  $w_{ij}^0$  and modifiable components  $\phi_j^{(k)}$ , with  $G$  and  $Q$  being constant  
84 parameters. While  $Q = 100$  throughout this paper, the value of  $G$  is mode-dependent, as shown  
85 later. The encoding parameter  $\eta_i^{(k)}$  is randomly drawn from the uniform distribution  $[-1, +1]^k$ ,  
86 where  $k = 2$  for the target trajectories representing a two-dimensional Lévy flight. The linear  
87 decoder  $\phi_i^{(k)}(t)$  determines activities of the readout units  $x^{(k)}(t)$ :

$$x^{(k)}(t) = \sum_{j=1}^N \phi_j^{(k)}(t) r_j(t), \quad (k = 1, 2) \quad (4)$$

88 which should approximate a given target trajectory. See Methods for the details of construction of  
89 Lévy flight and FORCE learning.

### 90 **Advantages of bursts over isolated spikes in sequence learning**

91 During learning, the model was repeatedly exposed to a periodic target signal representing the  
92 repetition of a finite portion of Lévy flight trajectories (Methods). The model can learn these  
93 trajectories in either RS or bursting mode. Large jumps in the trajectory are thought to be difficult  
94 for the model to accurately learn. As we will show later, the accuracy and speed of learning  
95 significantly depend on the mode of firing. Figure 1d displays an example of the time-varying  
96 output of the two readout neurons after the model learned a target signal in the bursting mode.  
97 As expected, the output of the model tends to deviate largely from the target trajectory when it  
98 shows relatively large jumps. Nonetheless, overall the model well replicates the target trajectory  
99 in the burst mode even after the learning process is turned off. The agreement between the target  
100 trajectory and the model's output is more clearly visible in the time evolution of the variables  $x_1$   
101 and  $x_2$  (Fig. 1e).

102 We quantitatively compare the performance of the model in learning between the bursting and  
103 RS modes. The strength of synaptic connections that gives an optimal performance may differ in  
104 the individual modes. To make a fair comparison, we first search an optimal coupling strength that

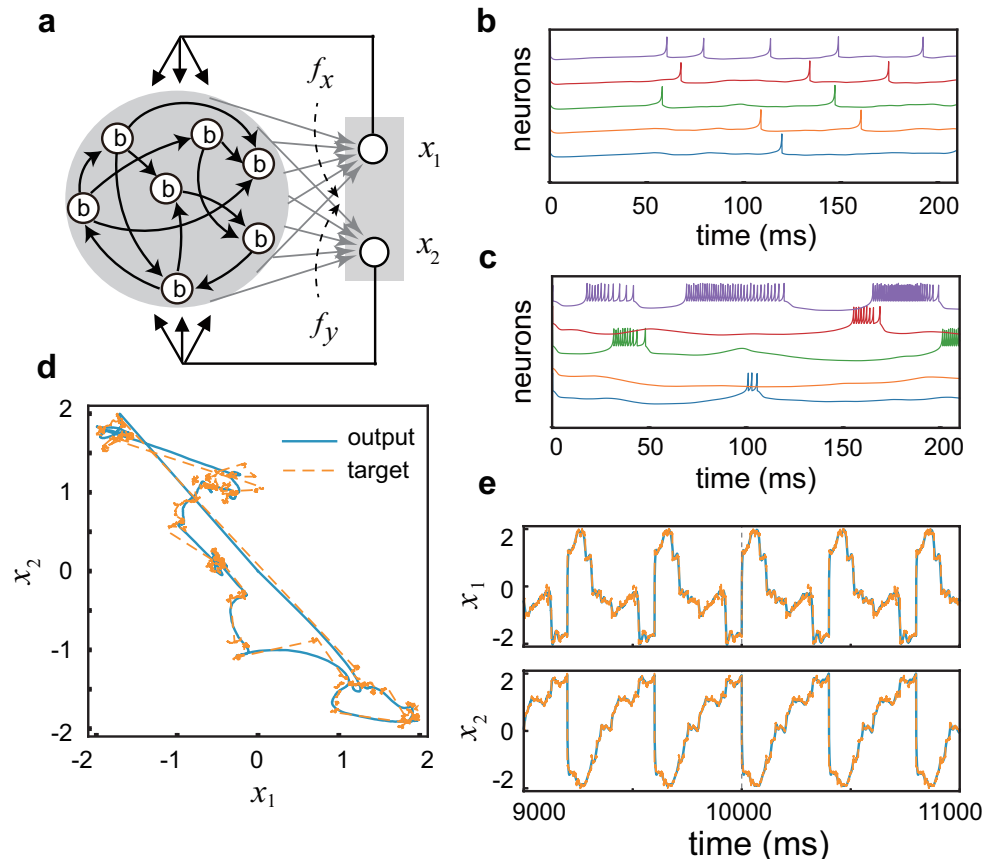

**Fig. 1. The architecture and basic performance of the model.** (a) The present RC system consists of a reservoir and two readout neurons. (b, c) Before learning, neurons in the reservoir tend to show isolated spikes in the RS mode (b) or intrinsic bursts in the bursting mode (c). Here, the firing patterns were simulated at  $G = 50$ . (d) A typical example of the target trajectories representing a finite portion of two-dimensional Lévy flight (orange) and the learned responses of the readout neurons (blue). (e) The time evolution of the two readout neurons are shown as functions of time. Large discontinuous jumps in (d) and (e) indicate the onset and end point of the repeated target signal.

105 minimizes the error in each mode. We calculate the average errors between a target trajectory and  
 106 an actual output in the bursting mode and the RS mode as a function of the connection strength  
 107  $G$ . Figure 2a and 2b show the errors obtained after 25 and 50 trials of learning, respectively,  
 108 when the target length is 400 ms. For each value of  $G$ , the standard deviations of the error are  
 109 calculated over simulations with 20 different initial conditions. As we can see from these figures,  
 110 the error is minimized for relatively weak connections ( $G \sim 50$ ) in the bursting mode. In contrast,  
 111 the model achieves the least error at much stronger connections ( $G \sim 170$ ) in the RS mode. The

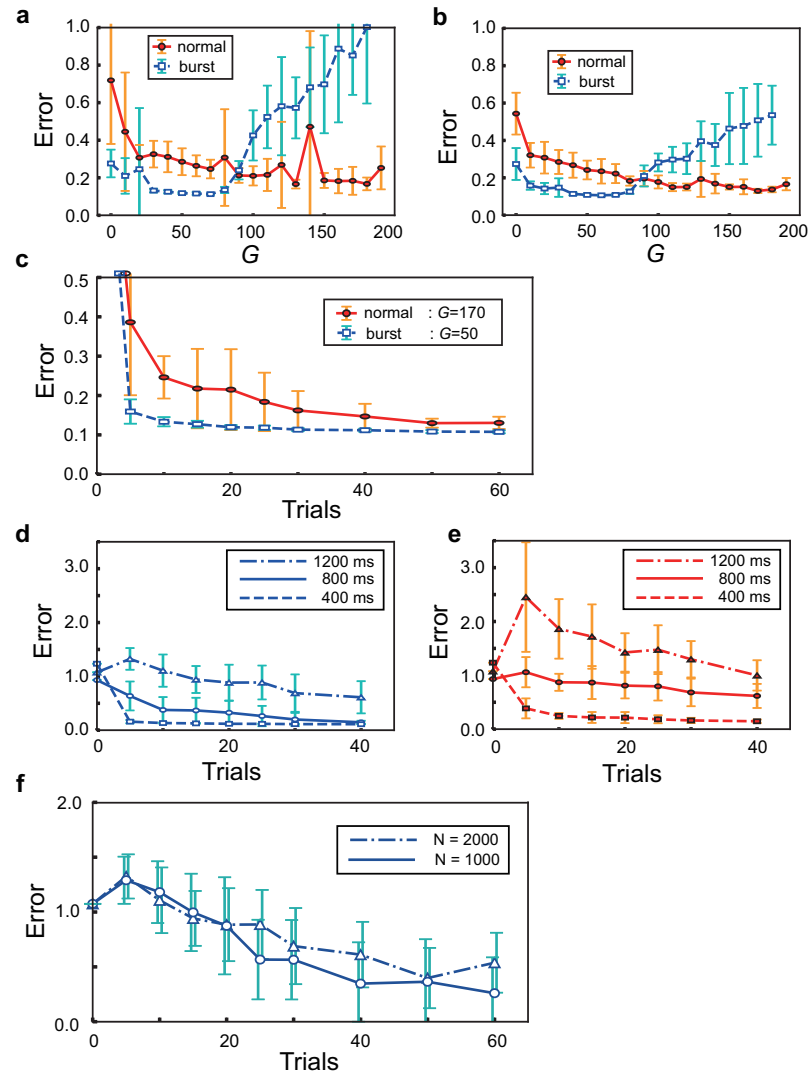

**Fig. 2. Learning in the burst vs. RS modes.** (a) Errors in the bursting and RS modes are plotted against the strength of recurrent connections after 25 learning trials. Error bars show the standard deviations. (b) Similar errors are plotted after 50 learning trials. (c) The time courses of errors during learning are shown for the optimal coupling strengths of the individual modes. (d, e) Similar time courses are shown in the bursting (d) and RS (e) modes for target signals of lengths 400, 800, and 1200 ms. The plots for 400 ms are copied from (c). (f) Error time courses are shown in the bursting mode when the target length is 1200 ms and the reservoir size is 1000 or 2000.

112 minimum average error is slightly smaller in the bursting mode than in the RS mode although the  
 113 error sizes are not greatly different between the two modes after 50 cycles of training (Fig. 2b).  
 114 Given these results, one might conclude that spike bursts have little advantage over isolated spikes  
 115 in the present sequence learning task.

116 However, the results presented in Fig. 2a and 2b reveal two intriguing differences in learning  
117 between the RS mode and the bursting mode. First, while the two modes yield approximately the  
118 same minimum values of average errors, the bursting mode yields a much smaller variance at the  
119 minimum error than the RS mode. In particular, Figure 2a demonstrates that the variance almost  
120 vanishes for the optimal range of  $G$  values after 25 training cycles in the bursting mode. This is not  
121 the case for the optimal range of  $G$  values in the RS mode. Second and more importantly, the aver-  
122 age error decreases much faster during learning in the bursting mode than in the RS mode, showing  
123 impressively different learning speeds between the two modes (Fig. 2c). Generally, the FORCE  
124 learning enables rapid learning of a smooth target trajectory even if the trajectory is chaotic [36].  
125 However, our results show that the FORCE learning with isolated spikes requires several tens of  
126 trials for learning a target trajectory representing random walks of Lévy flight. In strong contrast,  
127 spike bursts enable the same rule to learn such a target trajectory at a similar accuracy within only  
128 ten trials. The merits of bursting are also suggested by the common observation that the individual  
129 neurons tend to generate spike bursts after learning at the corresponding optimal coupling strength  
130 irrespective of the mode (Supplementary Fig. 1).

131 As the length of target trajectories is increased, performance in sequence learning is degraded  
132 in both modes. However, the superiority of the bursting mode over the RS mode in rapid sequence  
133 learning remains hold (Fig. 2d, e). We note that the absolute values of errors are not really  
134 meaningful. These values become smaller as we include more neurons in the reservoir (Fig. 2f).

135

### 136 **Learning through burst synchronization**

137 Now, we investigate why and how spike bursts improve the performance of the network model in  
138 learning trajectories of Lévy flight. We show that synchronized bursting of neurons plays an active  
139 role in the present sequence learning. Figure 3a shows the time evolution of a portion of the learned  
140 trajectory  $x_1(t)$  and  $x_2(t)$  with vertical dashed lines indicating the times of long-distance flights.  
141 Here, a long-distance flight refers to a step  $(\Delta x_1, \Delta x_2)$  of which the length  $\sqrt{\Delta x_1(t)^2 + \Delta x_2(t)^2}$   
142 is greater than 0.16, which approximately corresponds to the top 5% of long-distance jumps. In  
143 Fig. 3b and 3c, we show spike raster of 100 bursting neurons chosen randomly from the reservoir  
144 during the corresponding period of time before and after learning, respectively. While there are  
145 many neurons that rarely fire, some neurons intermittently generate brief ( $\sim 30$  ms) to prolonged  
146 ( $\sim 150$  ms) high-frequency bursts. The individual neurons change their firing patterns before and

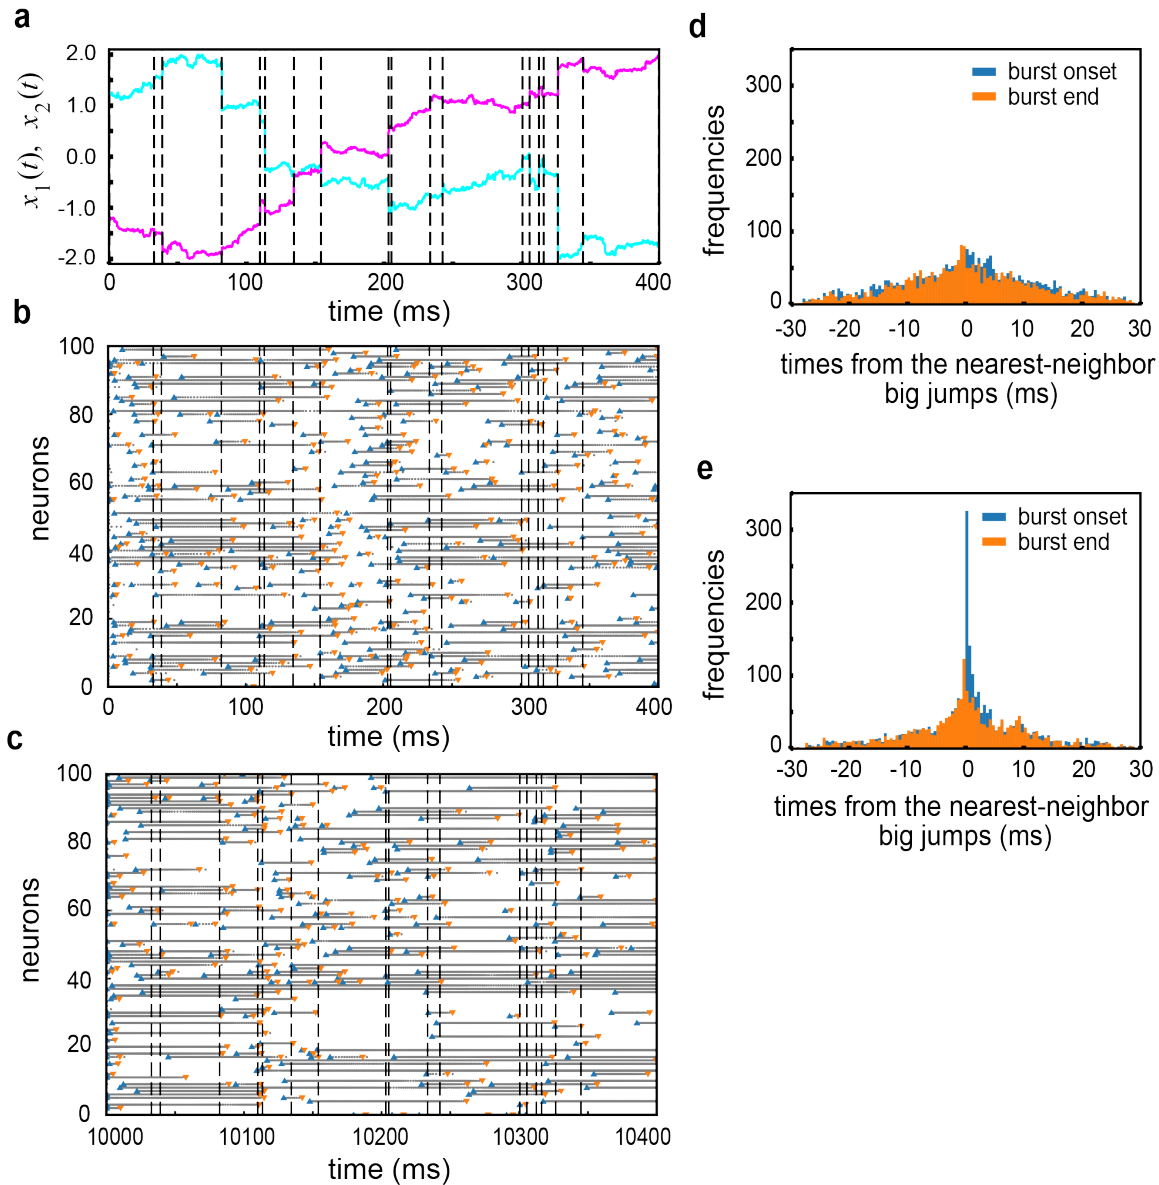

**Fig. 3. Temporal coordination of bursts by learning.** (a) A two-dimensional target trajectory shows big jumps at the times indicated by vertical dashed lines. (b) Spike raster of 100 neurons sampled randomly from the reservoir before learning. (c) Spike raster is shown for the same neurons after learning. (d, e) Distributions of the onset and end times of bursts around the times of big jumps are calculated before (d) and after (e) learning.

147 after learning, but the distributions of inter-spike intervals at the population level remain almost  
 148 unchanged during learning (Supplementary Fig. 2a, b).

149 However, visual inspection of the spike raster suggests that many neurons start or stop gen-  
 150 erating spike bursts around the times of large flights after learning and that such a tendency is



151 weak before learning. Therefore, regarding that spikes with their inter-spike intervals shorter than  
152 3 ms belonged to a burst, we identified the onsets and end times of bursts of individual neurons  
153 and calculated the distributions of the onset/end times of bursts relative to the times of the near-  
154 est large jumps (i.e., the times of burst onsets/ends minus the times of the nearest neighbor large  
155 flights) before (Fig. 3d) and after learning (Fig. 3e). Intriguingly, the post-learning distributions  
156 exhibited sharp peaks around the origin of the axis for the relative time. The relative times of burst  
157 onsets show a particularly prominent peak. These results reveal that the RC system operating in  
158 the bursting mode learns the target trajectory of Lévy flight by shifting the times of bursts close  
159 to the occurrence times of large jumps. In other words, the RC system synchronizes bursting of  
160 the individual neurons around the times of large jumps. This synchronization of bursts is thought  
161 to advantage recurrent networks of bursting neurons in learning of sequences that involve abrupt  
162 changes in the trajectories.

163

## 164 **DISCUSSION**

165 We have trained an RC system of spiking neurons on a difficult sequence learning task where the  
166 target sequence represents random walks. FORCE learning can project the neural population ac-  
167 tivity of the reservoir quickly onto a target trajectory for a wide range of continuous trajectories  
168 including chaotic ones. This fast convergence of learning is a merit of RC, making RC useful for  
169 various practical applications. However, when a target trajectory consists of abrupt steps including  
170 long-distance jumps, as was the case in Lévy flight, FORCE learning with isolated spikes requires  
171 a large number of trials for minimizing the error signal. In contrast, the same learning rule can  
172 rapidly minimize the error by aligning the onsets as well as the end times of bursts in the neigh-  
173 borhoods of the times of long-distance jumps. This implies that the system synchronizes bursts of  
174 the individual neurons around these times. Thus, the RC system can learn the Lévy flight trajec-  
175 tories much faster with bursts than with isolated spikes. Our model suggests that bursts contribute  
176 crucially to learning foraging-like cognitive behaviors.

177 Our results show an interesting qualitative agreement with some experimental observations. It  
178 has been known that the onsets of bursts in the saccade-related burst neurons are tightly linked  
179 to saccade onsets in the superior colliculus [8, 9]. These neurons tend to discharge prior to a  
180 saccade if the movement is in their preferred direction, and their discharges follow rather than  
181 precede saccades for movements deviating from their preferred directions. Although our model

182 is far simpler compared to the actual neural circuits that control saccadic eye movements [48],  
183 the sharp peak of burst onsets around the times of long-distance steps in Fig. 3e seems to be  
184 consistent with the characteristic behavioral correlates of the saccade-related burst neurons in the  
185 superior colliculus.

186 During spatial navigation, hippocampal place cells exhibit both bursts and isolated spikes [3],  
187 and the different discharging patterns are thought to play distinct functional roles in the hippocam-  
188 pal memory processing [3, 11, 49]. The hippocampal area CA3, which has prominent recurrent  
189 excitatory connections, resembles a reservoir in this model. Furthermore, an abstract model of the  
190 entorhinal-hippocampal memory system accounted for the different statistical structures of hip-  
191 pocampal sequence generation, such as diffusive vs. Lévy flight-like random walks [31]. There-  
192 fore, the hippocampal circuits are of potential relevance to this study. However, the relationships  
193 between spatial information coding and the cells' discharging patterns are not simple, depending  
194 on specific cell types and brain regions [32, 49]. To our knowledge, whether CA3 neural popu-  
195 lation synchronizes their burst discharges around the times of long-distance runs of animals has  
196 not been known. On the other hand, it is known that bursts of CA3 neurons mostly occur in an  
197 inbound travel towards their receptive field centers [10]. Clarifying the distinct computational  
198 roles of isolated spikes and bursts to the hippocampal memory processing is an intriguing open  
199 question.

200 In summary, this study showed the advantages of bursting neuronal activity in rapid learning of  
201 dynamical trajectories obeying Lévy flight. Bursting is ubiquitously found in various regions of  
202 the brain, and previous studies suggest the active roles of bursts in robust spike propagation and  
203 induction of synaptic plasticity. Our results give a further insight into the unique role of bursts at  
204 the network-level learning and computation.

## 205 **METHODS**

### 206 **Lévy flight**

207 Trajectories obeying Lévy flight were generated by using the function, `scipy.stats.levy_stable.rvs()`,  
208 in the Scipy library of Python for scientific calculations. This function generates a series of ran-  
209 dom numbers that obey the Lévy distribution [17, 18]. In short, a Lévy stable distribution has the

210 characteristic function of the form,

$$\varphi(t; \alpha, \beta, c, \mu) = e^{it\mu - |ct|^\alpha (1 - i\beta \operatorname{sign}(t)\Phi(\alpha, t))} \quad (5)$$

211 where  $\alpha$ ,  $\beta$ ,  $c$ , and  $\mu$  are the characteristic exponent, skewness parameter, scale parameter, and  
212 location parameter, respectively, and

$$\Phi = \begin{cases} \tan\left(\frac{\pi\alpha}{2}\right) & \alpha \neq 1 \\ -\frac{2}{\pi} \log |t| & \alpha = 1. \end{cases} \quad (6)$$

213 The probability density function for Lévy stable distributions is given as

$$f(x; \alpha, \beta, c, \mu) = \frac{1}{2\pi} \int_{-\infty}^{\infty} \varphi(t; \alpha, \beta, c, \mu) e^{-ixt} dt \quad (7)$$

214 where  $-\infty < x < \infty$ . Throughout this study, we set as  $\alpha = 1.5$ ,  $\beta = 0$ ,  $c = 1$  and  $\mu = 0$ .

215 Now, step sizes of a two-dimensional Lévy walk can be written as

$$\Delta x_1(t) = R(t) \cos \theta(t), \quad (8)$$

$$\Delta x_2(t) = R(t) \sin \theta(t), \quad (9)$$

216 where the angle of each step  $\theta(t)$  is drawn randomly from the uniform distribution  $0 \leq \theta \leq 2\pi$ ,  
217 and the step amplitude  $R(t)$  was determined as  $R = F^{-1}(r)$ , where

$$F(x; \alpha, \beta, c, \mu) = \int_x^{\infty} f(t; \alpha, \beta, c, \mu) dt \quad (10)$$

218 is the cumulative distribution function of  $f(x; \alpha, \beta, c, \mu)$  and  $0 < r \leq 1$  is a uniform random  
219 number.

220 We limited the target trajectories with in a square area  $|x_1| \leq 2$ ,  $|x_2| \leq 2$  by normalizing the  
221 coordinates of Lévy walk as

$$x_1(t) = 4 \frac{\Delta x_1(t) - \Delta x_{1,\min}}{\Delta x_{1,\max} - \Delta x_{1,\min}} - 2, \quad (11)$$

$$x_2(t) = 4 \frac{\Delta x_2(t) - \Delta x_{2,\min}}{\Delta x_{2,\max} - \Delta x_{2,\min}} - 2, \quad (12)$$

222 where  $\Delta x_{k,\min}$  and  $\Delta x_{k,\max}$  ( $k = 1, 2$ ) stand for the minimum and maximum values of the previous  
223 and current step sizes  $\Delta x_k(t')$  ( $t' \leq t$ ), respectively.

## 224 FORCE learning

225 We used a straight-forward extension of the FORCE learning to spiking neurons [46]. A double  
226 exponential filter was used to low-pass filter the individual spikes of the  $i$ -th neuron in the reservoir:

$$\dot{r}_i = -\frac{r_i}{\tau_d} + h_i, \quad (13)$$

$$\tau_r \dot{h}_i = -h_i + \frac{1}{\tau_d} \sum_{t_{ik} < t} \delta(t - t_{ik}), \quad (14)$$

227 where  $\tau_r$  and  $\tau_d$  are the synaptic rise time and synaptic decay time, respectively. Values of these  
228 parameters were set as  $\tau_r = 2$  ms and  $\tau_d = 20$  ms.

229 Using the error signals  $e^{(k)}(t) = f^{(k)}(t) - x^{(k)}(t)$ , we update the decoders as follows:

$$\phi^{(k)}(t) = \phi^{(k)}(t - \Delta t) - e^{(k)}(t) \mathbf{P}(t) \mathbf{r}(t), \quad (15)$$

$$\mathbf{P}(t) = \mathbf{P}(t - \Delta t) - \frac{\mathbf{P}(t - \Delta t) \mathbf{r}(t) \mathbf{r}(t)^T \mathbf{P}(t - \Delta t)}{1 + \mathbf{r}(t)^T \mathbf{P}(t - \Delta t) \mathbf{r}(t)}. \quad (16)$$

230 The initial conditions are given as  $\phi_j^{(k)}(0) = 0$  and  $\mathbf{P}(0) = \mathbf{I}_N / \lambda$ , where  $\mathbf{I}_N$  is an  $N$ -dimensional  
231 identity matrix and  $\lambda = 10$  for both regular and bursting modes.

232

## 233 ACKNOWLEDGMENTS

234 This work was partly supported by Grants-in-Aid for Specially Promoted Research (JSPS KAK-  
235 ENHI) no. 18H05213.

## 236 REFERENCES

- 237 [1] Lisman, J. E. Bursts as a unit of neural information: making unreliable synapses reliable. *Trends*.  
238 *Neurosci.* **20**, 38-43 (1997).
- 239 [2] Fanselow, E. E., Sameshima, K., Baccala, L. A. & Nicolelis, M. A. Thalamic bursting in rats during  
240 different awake behavioral states. *Proc. Natl. Acad. Sci. USA* **98**, 15330-15335 (2001).
- 241 [3] Harris, K. D., Hirase, H., Leinekugel, X., Henze, D. A. & Buzsáki, G. Temporal interaction between  
242 single spikes and complex spike bursts in hippocampal pyramidal cells. *Neuron* **32**, 141-149 (2001).
- 243 [4] Izhikevich, E. M., Desai, N. S., Walcott, E. C. & Hoppensteadt, F. C. Bursts as a unit of neural  
244 information: selective communication via resonance. *Trends. Neurosci.* **26**, 161-167 (2003).

- 245 [5] Naud, R. & Sprekeler, H. Sparse bursts optimize information transmission in a multiplexed neural  
246 code. *Proc. Natl. Acad. Sci. USA* **115**, E6329-E6338 (2018).
- 247 [6] Larson, J. & Lynch, G. Induction of synaptic potentiation in hippocampus by patterned stimulation  
248 involves two events. *Science* **232**, 985-988 (1986).
- 249 [7] Yin, L. et al. Autapses enhance bursting and coincidence detection in neocortical pyramidal cells. *Nat.*  
250 *Commun.* **9**, 4890 (2018).
- 251 [8] Goossens, H. H. L. M. & van Opstal A. J. Optimal Control of Saccades by Spatial-Temporal Activity  
252 Patterns in the Monkey Superior Colliculus. *PLoS Comput. Biol.* **8**, e1002508 (2012).
- 253 [9] Sparks, D. L. & Mays, L. E. Movement fields of saccade-related burst neurons in the monkey superior  
254 colliculus. *Brain Res.* **190**, 39-50 (1980).
- 255 [10] Mizuseki, K., Royer, S., Diba, K. & Buzsaki, G. Activity dynamics and behavioral correlates of CA3  
256 and CA1 hippocampal pyramidal neurons. *Hippocampus* **22**, 1659-1680 (2012).
- 257 [11] Xu, W. et al. Distinct neuronal coding schemes in memory revealed by selective erasure of fast syn-  
258 chronous synaptic transmission. *Neuron* **73**, 990-1001 (2012).
- 259 [12] Payeur, A., Guerguiev, J., Zenke, F., Richards, B. A. & Naud, R. Burst-dependent synaptic plasticity  
260 can coordinate learning in hierarchical circuits. *Nat. Neurosci.* **24**, 1010-1019 (2021).
- 261 [13] Wang, M. et al. Single-neuron representation of learned complex sounds in the auditory cortex. *Nat.*  
262 *Commun.* **11**, 4361 (2020).
- 263 [14] Fujita, K., Kashimori, Y. & Kambara, T. Spatiotemporal burst coding for extracting features of spa-  
264 tiotemporally varying stimuli. *Biol. Cybern.* **97**, 293-305 (2007).
- 265 [15] Miller, B. R., Walker, A. G., Barton, S. J. & Rebec, G. V. Dysregulated neuronal activity patterns  
266 implicate corticostriatal circuit dysfunction in multiple rodent models of Huntingtons disease. *Front.*  
267 *Syst. Neurosci.* **5**, 26 (2011).
- 268 [16] Yang, Y. et al. Ketamine blocks bursting in the lateral habenula to rapidly relieve depression. *Nature*  
269 **554**, 317-322 (2018).
- 270 [17] Lévy, P. *Theorie de L'Addition des Variables Aleatoires*. (Gauthier-Villars, Paris, 1954).
- 271 [18] Mandelbrot, B. *The Fractal Geometry of Nature*. (Freeman, New York, 1977).
- 272 [19] Abe, M. S. Functional advantages of Lévy walks emerging near a critical point. *Proc. Natl. Acad. Sci.*  
273 *USA* **117**, 24336-24344 (2020).
- 274 [20] Viswanathan, G. M. et al. Optimizing the success of random searches. *Nature* **401**, 911-914 (1999).

- 275 [21] Bartumeus, F., Da Luz, M. G. E., Viswanathan, G. M. & Catalan, J. Animal search strategies: A  
276 quantitative random-walk analysis. *Ecology* **86**, 30783087 (2005).
- 277 [22] Ott, A., Bouchaud, J., Langevin, D. & Urbach, W. Anomalous diffusion in living polymers: a genuine  
278 Lévy flight? *Phys. Rev. Lett.* **65**, 22012204 (1990).
- 279 [23] Brockmann, D., Hufnagel, L. & Geisel, T. The scaling laws of human travel. *Nature* **439**, 462465  
280 (2006).
- 281 [24] Huda, S. et al. Lévy-like movement patterns of metastatic cancer cells revealed in microfabricated  
282 systems and implicated in vivo. *Nat. Commun.* **9**, 4539 (2018).
- 283 [25] Corral, A. Universal earthquake-occurrence jumps, correlations with time, and anomalous diffusion.  
284 *Phys. Rev. Lett.* **97**, 178501 (2006).
- 285 [26] Barthelemy, P., Bertolotti, J. & Wiersma, D. A Lévy flight for light. *Nature* **453**, 495498 (2008).
- 286 [27] Boccignone, G. & Ferraro, M. Modelling gaze shift as a constrained random walk. *Physica A* **331**,  
287 207-218 (2004).
- 288 [28] Sparks, D. L. & Barton E. J. Neural control of saccadic eye movements. *Curr. Opin. Neurobiol.* **3**,  
289 966-972 (1993).
- 290 [29] Kojima, Y. A neuronal process for adaptive control of primate saccadic system. *Prog. Brain Res.* **249**,  
291 169-181 (2019).
- 292 [30] Quinet, J., Schultz, K., May, P. J. & Gamlin, P. D. Neural control of rapid binocular eye movements:  
293 Saccade-vergence burst neurons. *Proc. Natl. Acad. Sci. USA* **117**, 29123-29132 (2020).
- 294 [31] McNamee, D. C., Stachenfeld, K. L., Botvinick, M. M. & Gershman, S. J. Flexible modulation of  
295 sequence generation in the entorhinal-hippocampal system. *Nat. Neurosci.* **24**, 851-862 (2021).
- 296 [32] Simonnet, J. & Brecht, M. Burst Firing and Spatial Coding in Subicular Principal Cells. *J. Neurosci.*  
297 **39**, 3651-3662 (2019).
- 298 [33] Rhodes, T. & Turvey, M. T. Human memory retrieval as lévy foraging. *Physica A* **385**, 255260 (2007).
- 299 [34] Costa, T., Boccignone, G., Cauda, F. & Ferraro, M. The Foraging Brain: Evidence of Lévy Dynamics  
300 in Brain Networks. *PLoS One* **11**, e0161702 (2016).
- 301 [35] Patten, K. J., Greer, K., Likens, A. D., Amazeen, E. L. & Amazeen, P. G. The trajectory of thought:  
302 Heavy-tailed distributions in memory foraging promote efficiency. *Mem. Cogn.* **48**, 772787 (2020).
- 303 [36] Sussillo, D. & Abbott, L. F. Generating coherent patterns of activity from chaotic neural networks.  
304 *Neuron* **63**, 544-557 (2009).

- 305 [37] Sussillo, D., Churchland, M. M., Kaufman, M. T. & Shenoy, K. V. A neural network that finds a  
306 naturalistic solution for the production of muscle activity. *Nat. Neurosci.* **18**, 1025-1033 (2015).
- 307 [38] Rajan, K., Harvey, C.D. & Tank, D. W. Recurrent Network Models of Sequence Generation and  
308 Memory. *Neuron* **90**, 128-142 (2016).
- 309 [39] Enel, P., Procyk, E., Quilodran, R. & Dominey, P. F. Reservoir Computing Properties of Neural Dy-  
310 namics in Prefrontal Cortex. *PLoS Comput. Biol.* **12**, e1004967 (2016).
- 311 [40] Martín-Vázquez, G., Asabuki, T., Isomura, Y. & Fukai, T. Learning Task-Related Activities From  
312 Independent Local-Field-Potential Components Across Motor Cortex Layers. *Front. Neurosci.* **12**,  
313 429 (2018).
- 314 [41] Denève, S. & Machens, C. K. Efficient codes and balanced networks. *Nat. Neurosci.* **19**, 375-382  
315 (2016).
- 316 [42] Abbott, L., DePasquale, B. & Memmesheimer, R. M. Building functional networks of spiking model  
317 neurons. *Nat. Neurosci.* **19**, 350355 (2016).
- 318 [43] Bellec, G. et al. A solution to the learning dilemma for recurrent networks of spiking neurons. *Nat.*  
319 *Commun.* **11**, 3625 (2020).
- 320 [44] Thalmeier, D., Uhlmann, M., Kappen, H. J. & Memmesheimer, R-M. Learning Universal Computa-  
321 tions with Spikes. *PLoS Comput. Biol.* **12**, e1004895 (2016).
- 322 [45] Kim, C. M. & Chow, C. C. Learning recurrent dynamics in spiking networks. *eLife* **7**, e37124 (2018).
- 323 [46] Nicola, W. & Clopath, C. Supervised learning in spiking neural networks with FORCE training. *Nat.*  
324 *Commun.* **8**, 2208 (2017).
- 325 [47] Izhikevich, E. M. Simple model of spiking neurons. *IEEE Trans. Neural Netw.* **14**, 1569-1572 (2003).
- 326 [48] Optican, L. M. & Pretegianni, E. What stops a saccade? *Phil. Trans. R. Soc. B* **372**, 20160194 (2017).
- 327 [49] Epsztein, J., Brecht, M. & Lee, A. K. Intracellular determinants of hippocampal CA1 place and silent  
328 cell activity in a novel environment. *Neuron* **70**, 109120 (2011).

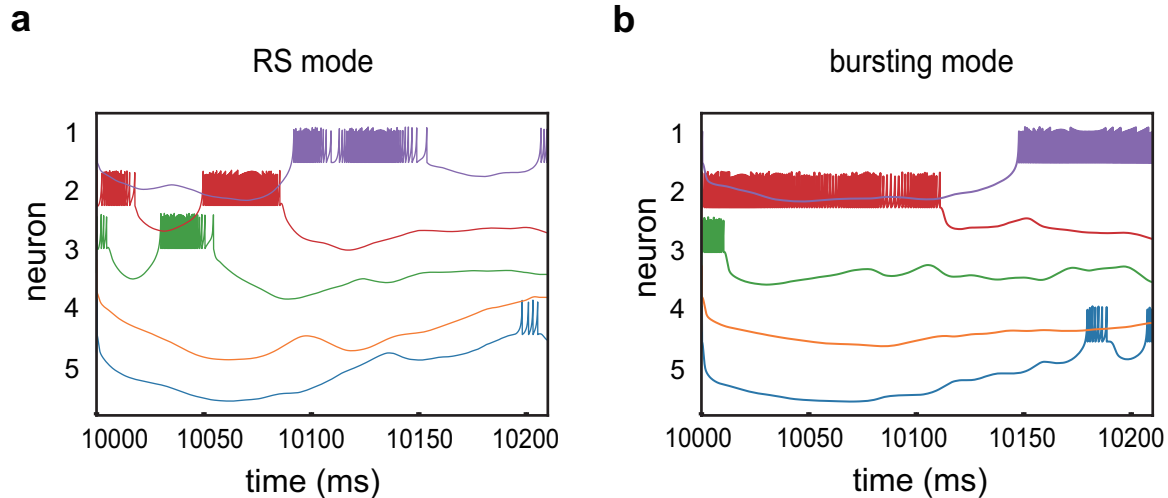

**Supplementary Figure 1. Post-learning firing patterns.** (a, b) Temporal spiking patterns after learning in the RS mode (a) or bursting mode (b) are plotted for five neurons. These patterns were obtained at the optimal coupling strengths of the individual modes.

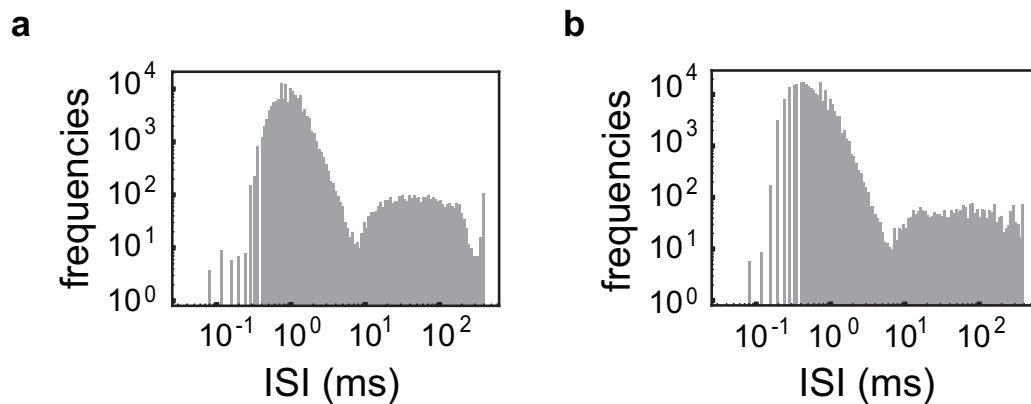

**Supplementary Figure 2. The post-learning inter-spike-interval distributions.** (a, b) The inter-spike-interval distributions are calculated over all neurons in the reservoir after learning in the RS mode (a) and bursting mode (b). The Izhikevich model used in this study does not take refractory periods into account and occasionally generates unrealistically short ISIs. Sharp upper bounds at 400 ms represent the length of the target signals used in the simulations.
